# Supplementary material for: Regulation of Helicobacter pylori Urease and Acetone Carboxylase Genes by Nitric Oxide and the CrdRS Two-Component System
Source: PubMed Central journal article supplement (PMC9927306; doi:10.1128/spectrum.04633-22), 2023-01-10
Supplement: spectrum.04633-22-s0001.pdf [file spectrum.04633-22-s0001.pdf]

## Supplemental Information

Table S1. Custom TaqMan gene expression assays used in RT-qPCR.

| Gene Name      | Forward Primer            | Reverse Primer                     | Reporter         |
|----------------|---------------------------|------------------------------------|------------------|
| <i>gyrB</i>    | AAAGCCAGAGAGCTTACAAGGAAAA | CGCCCTCCACTAAAAAGATTTCACT          | TTGCCTGGAAAATTAG |
| <i>ureA</i>    | AAGACATCACTATCAACGAAGGCAA | CGATTTGAACCGGTCTGTCTG              | CACGCTAACGGCTTTT |
| <i>acxA</i>    | TCAAACGCTGATACCCACTTCTC   | CATCTGGATTATCCAAGTCCCTTT           | ATGGCGCTTATTTTGC |
| <i>acxB</i>    | GGGAGTTTTGTGCGCATTGAT     | GCTGTCAGGCCCTAGTTTGA               | CCACACAGCCGATCTG |
| <i>hofC</i>    | GTGGTTGTTCCTATCTATCGTGAA  | ACACATAAGGGTGGATCATCAAATCTTT       | CCCGCTTTATGAACCC |
| <i>hofD</i>    | GCGTCAAGCGACTGGTTTT       | CCATTAGAGCCTTACCGCTTGATA           | TAACGCCAAAATACC  |
| <i>hopZ</i>    | CGCCTATGTGGAAGAGACGATA    | CGGCTTGAGTGCCAAAATGC               | ACCGCCCTAAATAACA |
| <i>hopE</i>    | GGCAAGCAAGTTTATGCACCTAAT  | TCGTATCAATAATATCAGCTAACAAATCGCT    | CCACACCCCAAGAGAC |
| <i>horF</i>    | GTATTTGGAGCGAACGCTTTAACAT | GTCGCACATGGTTGGTGAAG               | ACACCCACCAATTATC |
| <i>flaB</i>    | TGTGGAAGCGAGCTTGGATATTC   | CGCCCGTCAATGGAGTGT                 | AAGGGCGCATTAATTT |
| <i>HP_1440</i> | GGAATCAAGGGCTTTCGCTTTTAA  | TCCTTGCATGATAATAGCTCTCTCTCT        | AACCGCCGATTTTAG  |
| <i>HP_1076</i> | CCATGATTGTGGTTAATCCGTTGGA | CTCAAATAACCTAATAATTCCTTAATTTCTCTCT | TCGCCACATTTTCCA  |
| <i>glnP</i>    | ATCGGTTTGAGCGCTTTAGAGT    | CTCATATACCCCCACCCAAAAA             | CCCTAACGCTAAAATC |

The reporters have FAM as the fluorophore at the 5' end and NQR as the quencher at the 3' end.

Table S2. Validation of a subset of the CrdRS TCS regulon via RT-qPCR.

| Identification        |           |                                              | RNA-Seq               |         |                       |         | RT-qPCR               |         |                       |         |
|-----------------------|-----------|----------------------------------------------|-----------------------|---------|-----------------------|---------|-----------------------|---------|-----------------------|---------|
|                       |           |                                              | $\Delta crdS$ Average |         | $\Delta crdR$ Average |         | $\Delta crdS$ Average |         | $\Delta crdR$ Average |         |
| RefSeq Identification | Locus Tag | Gene Function                                | Fold change           | P-value | Fold change           | P-value | Fold change           | P-value | Fold change           | P-value |
| HP_RS03405            | HP0696    | <i>acxB</i>                                  | 2.54                  | **      | ◇                     | ns      | 4.69                  | ***     | 4.98                  | **      |
| HP_RS00585            | HP0115    | <i>flaB</i>                                  | 2.90                  | **      | ◇                     | ns      | ◇                     | ns      | 0.40                  | **      |
| HP_RS02405            | HP0486    | <i>hofC</i>                                  | 0.44                  | **      | ◇                     | ns      | 0.31                  | ***     | ◇                     | ns      |
| HP_RS03445            | HP0706    | <i>hopE</i>                                  | 0.45                  | **      | ◇                     | ns      | ◇                     | ns      | ◇                     | ns      |
| HP_RS00060            | HP0009    | <i>hopZ</i>                                  | ◇                     | ns      | 0.30                  | **      | ◇                     | ns      | ◇                     | ns      |
| HP_RS03300            | HP0671    | <i>horF</i>                                  | 0.38                  | ***     | ◇                     | ns      | 0.40                  | **      | 0.68                  | *       |
| HP_RS05290            | HP1076    | Flagellar<br>FLIS export<br>co-<br>chaperone | 2.60                  | *       | ◇                     | ns      | ◇                     | ns      | ◇                     | ns      |

Table S2 shows RefSeq identification, locus tag, gene function, average fold change per condition of three biological replicates, and average p-value of each condition. The comparisons were (i) *H. pylori* 26695/ $\Delta rdxA$  (control) vs. *H. pylori* 26695/ $\Delta rdxA/\Delta crdS$  ( $\Delta crdS$  Average) and (ii) *H. pylori* 26695/ $\Delta rdxA$  (control) vs. *H. pylori* 26695/ $\Delta rdxA/\Delta crdR$  ( $\Delta crdR$  Average) for RNA-Seq and RT-qPCR. ◇ represents non-DE. DESeq2 determined

19 significance between the control and the mutants for RNA-Seq and an ANOVA was performed to determine  
 20 significance between the control and the mutants, followed by a Tukey HSD test for RT-qPCR (\*\*\* =  $p \leq 0.001$ , \*\*  
 21 =  $p \leq 0.01$ , \* =  $p \leq 0.05$ , ns =  $p > 0.05$ ). Additional verifications shown in Figure 1.

22  
 23  
 24  
 25  
 26

**Table S3. Confirmation of the CrdRS TCS target regulon via CrdRS phospho-incompetent missense mutants using RT-qPCR.**

| Identification |        |             | Deletion Mutants      |         |                       |         | Phospho-Incompetent Mutants |         |             |         |
|----------------|--------|-------------|-----------------------|---------|-----------------------|---------|-----------------------------|---------|-------------|---------|
|                |        |             | $\Delta crdS$ Average |         | $\Delta crdR$ Average |         | CrdS H173A                  |         | CrdR D53A   |         |
| RefSeq         | Locus  | Gene Name   | Fold change           | P-value | Fold change           | P-value | Fold change                 | P-value | Fold change | P-value |
| HP_RS02405     | HP0486 | <i>hofC</i> | 0.31                  | ***     | ◇                     | ns      | ◇                           | ns      | ◇           | ns      |
| HP_RS03300     | HP0671 | <i>horF</i> | 0.40                  | **      | 0.68                  | *       | ◇                           | ns      | ◇           | ns      |

27  
 28  
 29  
 30  
 31  
 32  
 33  
 34  
 35  
 36  
 37

Table S3 shows RefSeq identification, locus tag, gene function, average fold change per condition, and average p-value of each condition. The comparisons were *H. pylori* 26695/ $\Delta rdxA$  (control) vs. (i) *H. pylori* 26695/ $\Delta rdxA/\Delta crdS$  ( **$\Delta crdS$  Average**), (ii) *H. pylori* 26695/ $\Delta rdxA$  vs. *H. pylori* 26695/ $\Delta rdxA/\Delta crdR$  ( **$\Delta crdR$  Average**), (iii) *H. pylori* 26695/ $\Delta rdxA$ /CrdS H173A (**CrdS H173A**), and (iv) *H. pylori* 26695/ $\Delta rdxA$ /CrdR D53A (**CrdR D53A**) for three biological replicates of RT-qPCR. An ANOVA was performed to determine significance between the control and each mutant, followed by a Tukey HSD test (\*\*\* =  $p \leq 0.001$ , \*\* =  $p \leq 0.01$ , \* =  $p \leq 0.05$ , ns =  $p > 0.05$ ). Additional genes shown in Figure 2.
